# Supplementary material for: Two novel zeolitic imidazolate frameworks (ZIFs) as sorbents for solid-phase extraction (SPE) of polycyclic aromatic hydrocarbons (PAHs) in environmental water samples
Source: Royal Society of Chemistry journal article supplement (doi:10.1039/c4an01410c), 2014-01-01
Supplement: c4an01410c1.pdf [file c4an01410c1.pdf]

## Supporting Information

### Two novel zeolitic imidazolate frameworks (ZIFs) as sorbents for solid-phase extraction (SPE) of polycyclic aromatic hydrocarbons (PAHs) in environmental water samples

Huiping Hu, Shengquan Liu\*, Chunyan Chen, Jianping Wang, Ying Zou,  
Lihua Lin and Shouzhao Yao\*

*State Key Laboratory of Chemo/Biosensing & Chemometrics, College of Chemistry  
& Chemical Engineering, Hunan University, Changsha 410082, China*

*E-mail: szyao@hnu.edu.cn; shengquanliu7068@163.com ;Tel: +86-731-88821968*

## 2. Experimental

### 2.5 HPLC analysis

Table S1 Time program of emission and excitation wavelengths of FLD in the analysis of PAHs.

| Time (min) | Emission (nm) | Excitation (nm) | PAHs     |
|------------|---------------|-----------------|----------|
| 0          | 340           | 260             | Flu      |
| 13.2       | 370           | 250             | Ant      |
| 15.5       | 462           | 289             | FlA      |
| 17.5       | 380           | 320             | Pyr      |
| 21         | 403           | 266             | BaA      |
| 25         | 430           | 294             | BbF, BkF |

### 3. Results and discussion

#### 3.1. Characterization of ZIFs

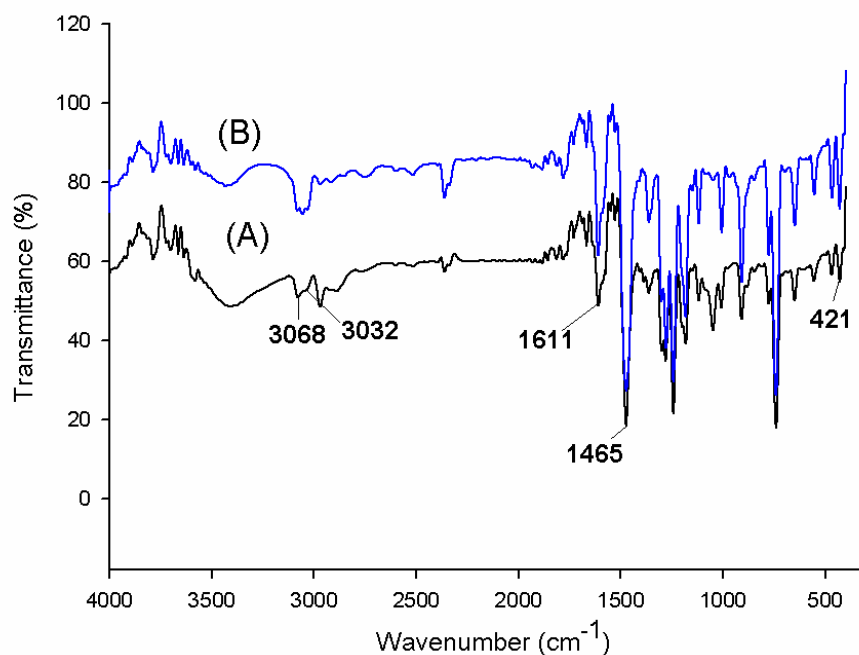

Figure S1 FT-IR spectra of (A) ZIF-7 and (B) ZIF-11 crystals.

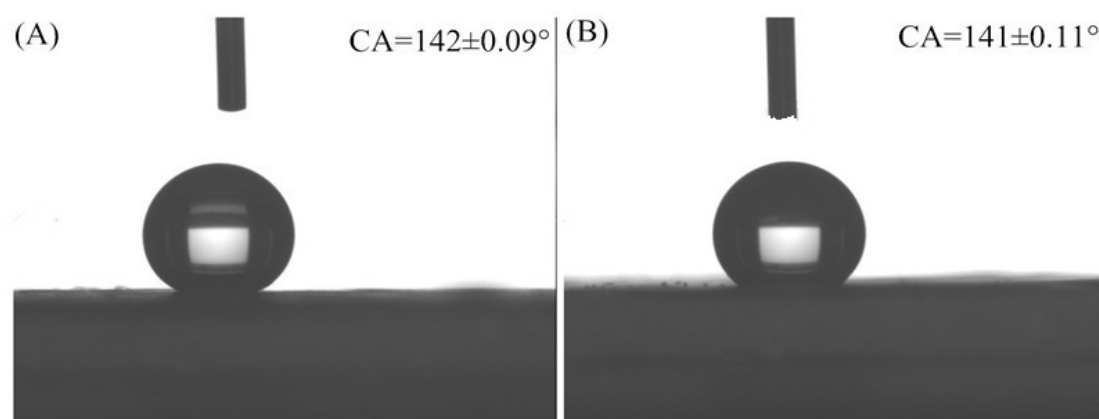

Figure S2 Water contact angle images for (A) ZIF-7, (B) ZIF-11.

##### 3.1.1. Nitrogen adsorption/desorption isotherms

Nitrogen adsorption/desorption isotherms were also measured for ZIF-7 and ZIF-11. However, the results (not shown) indicated that the uptakes of  $N_2$  at 77 K in ZIF-7 and ZIF-11 were both very low, which matched well with the previous reports.<sup>1-4</sup> According to the relevant literature,<sup>2,3</sup> this is attributed to the small aperture of the channels in ZIF-7 and ZIF-11. The pore diameters of ZIF-7 and ZIF-11 are 4.3 and 14.6 Å, respectively, which are both larger than nitrogen molecule (3.6 Å).<sup>5</sup> However,

their pore apertures are only 2.9 and 3.0 Å, which exclude N<sub>2</sub> to penetrate into the pores.

### 3.3. Extraction optimization

#### 3.3.2. Optimization of extraction time

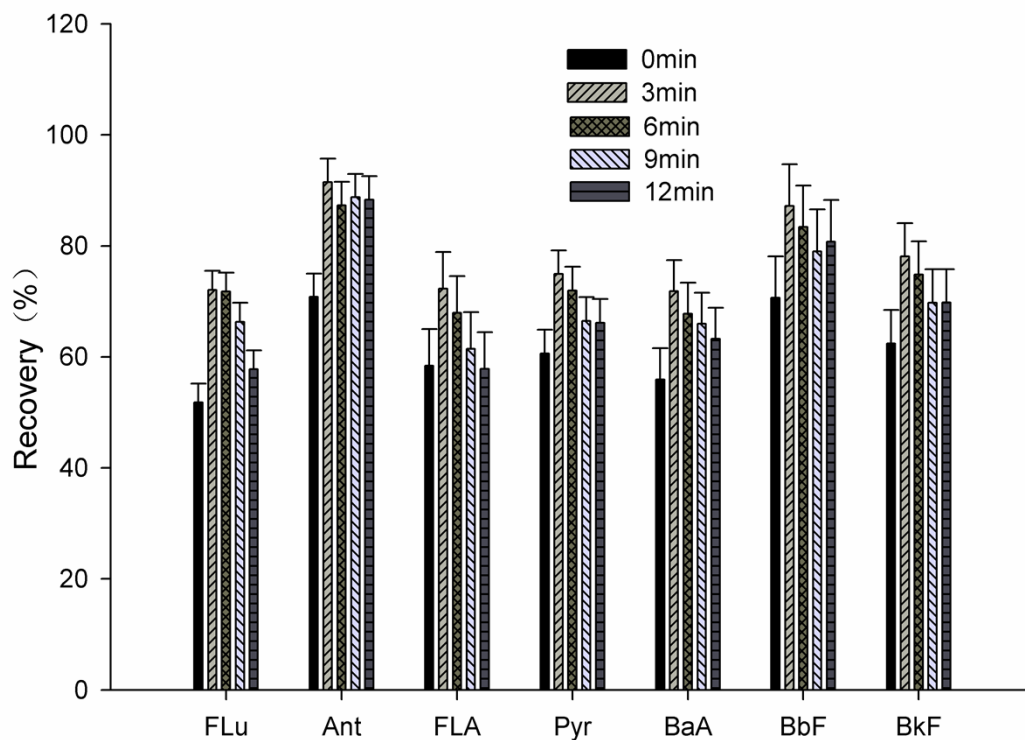

Figure S3 Effect of extraction time on the recoveries of PAHs. Extraction conditions: sorbent, 100 mg; sample volume, 200 mL; desorption conditions, 3×2 mL acetonitrile; organic modifier, 3 mL methanol; no salt addition.

### 3.3.3. Optimization of desorption conditions

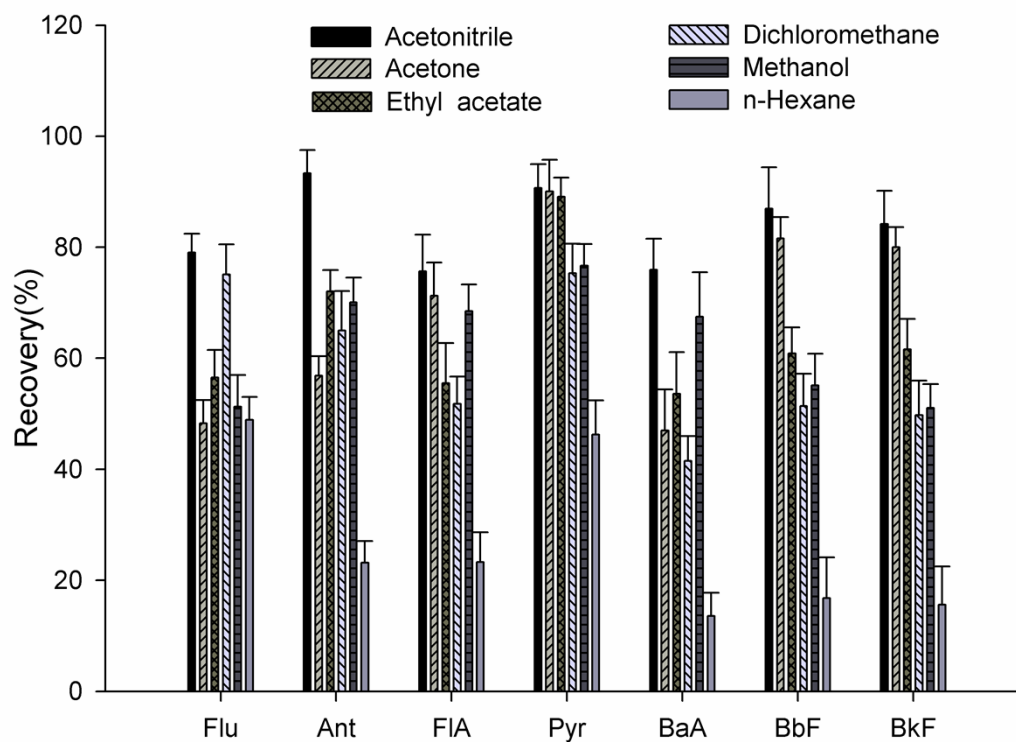

Figure S4 Effect of the type of elution solvent on the recoveries of PAHs. Extraction conditions: sorbent, 100 mg; sample volume, 200 mL; extraction time, 3 min; desorption solvent volume, 3×2 mL; organic modifier, 3 mL methanol; no salt addition.

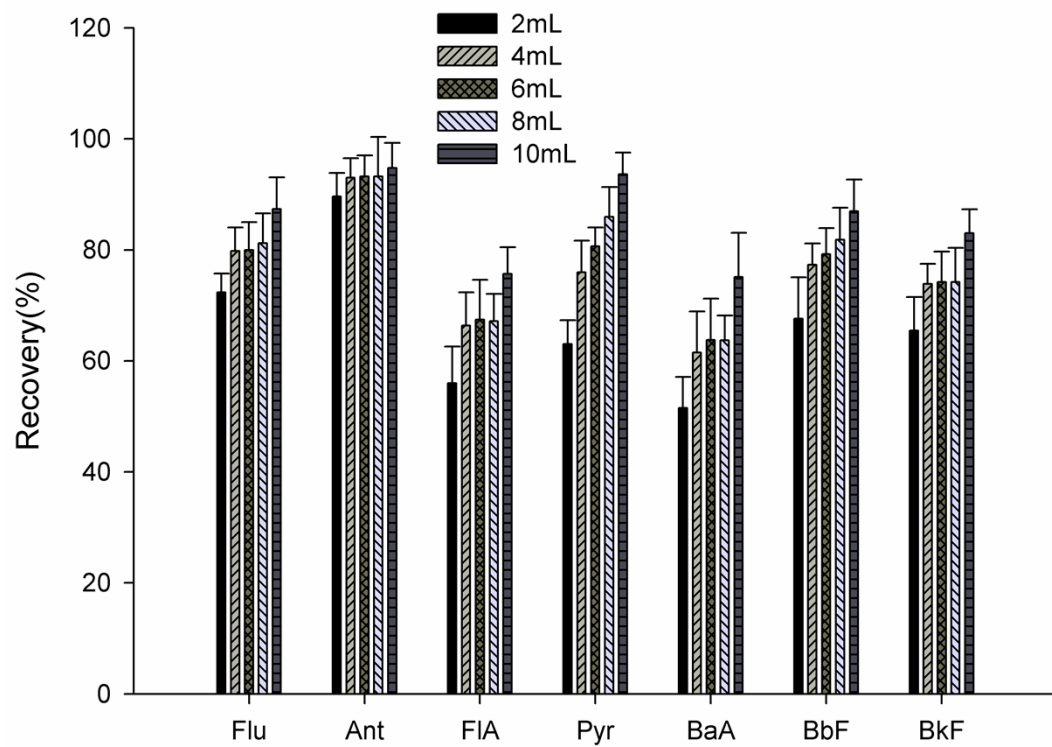

Figure S5 Effect of eluent volume on the recoveries of PAHs. Extraction conditions: sorbent, 100 mg; sample volume, 200 mL; extraction time, 3 min; desorption solvent, acetonitrile; organic modifier, 3 mL methanol; no salt addition.

### 3.5 Application in real water samples analysis

Table S2 Analysis results for the determination of PAHs in unspiked real water samples (n=5).

a) not detected

| PAHs | Spring water                             |     | Tap water                                |     | River water                              |     |
|------|------------------------------------------|-----|------------------------------------------|-----|------------------------------------------|-----|
|      | Detected                                 | RSD | Detected                                 | RSD | Detected                                 | RSD |
|      | Concentrations<br>( ng L <sup>-1</sup> ) | (%) | Concentrations<br>( ng L <sup>-1</sup> ) | (%) | Concentrations<br>( ng L <sup>-1</sup> ) | (%) |
| Flu  | n.d. <sup>a)</sup>                       | -   | n.d.                                     | -   | 45.7                                     | 8.5 |
| Ant  | n.d.                                     | -   | n.d.                                     | -   | n.d.                                     | -   |
| FlA  | n.d.                                     | -   | n.d.                                     | -   | 56.8                                     | 3.9 |
| Pyr  | n.d.                                     | -   | n.d.                                     | -   | 54.1                                     | 2.7 |
| BaA  | n.d.                                     | -   | n.d.                                     | -   | n.d.                                     | -   |
| BbF  | n.d.                                     | -   | n.d.                                     | -   | n.d.                                     | -   |
| BkF  | n.d.                                     | -   | n.d.                                     | -   | 5.3                                      | 1.9 |

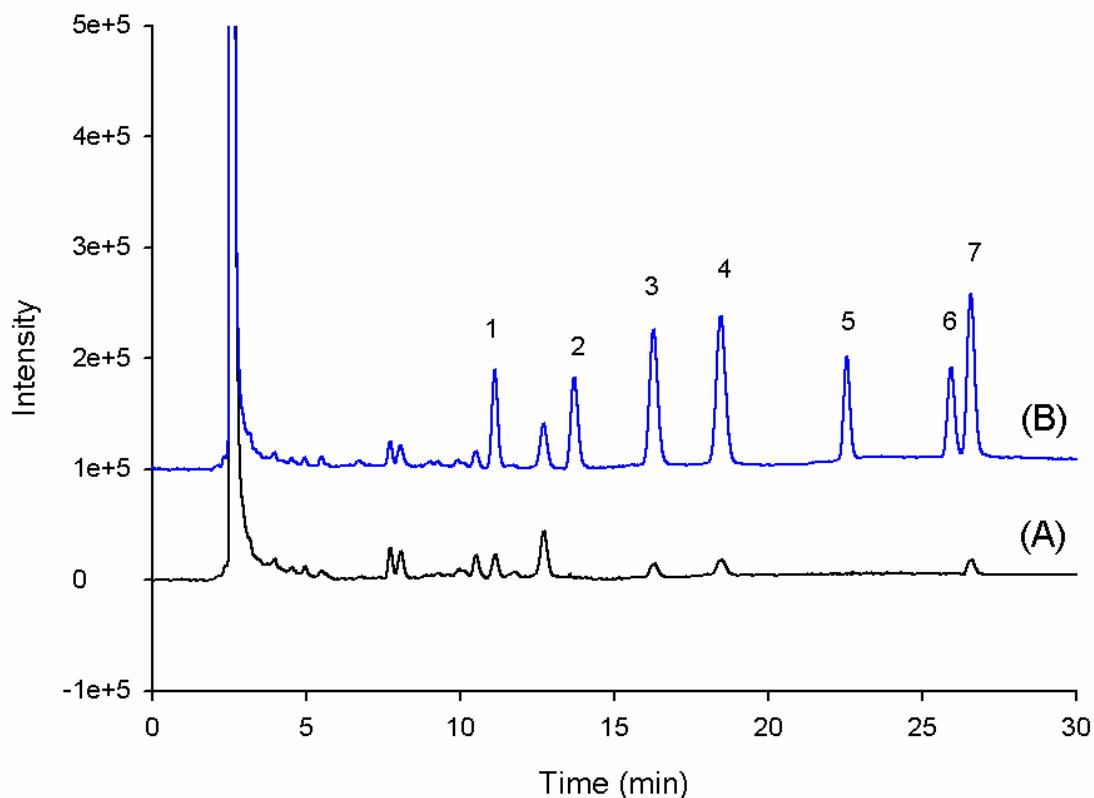

Figure S6 Chromatograms of PAHs in Xiangjiang river water: (A) unspiked; (B) spiked: 187.5 ng L<sup>-1</sup> Flu, 500 ng L<sup>-1</sup> Ant, 1000 ng L<sup>-1</sup> FIA, 500 ng L<sup>-1</sup> Pyr, 187.5 ng L<sup>-1</sup> BaA, 185.7 ng L<sup>-1</sup> BbF, 50 ng L<sup>-1</sup> BkF. Peaks: (1) Flu; (2) Ant; (3) FIA; (4) Pyr; (5) BaA; (6) BbF; (7) BkF.

## References

1. J. R. Li, R. J. Kuppler and H. C. Zhou, *Chem. Soc. Rev.*, 2009, **38**, 1477-1504.
2. W. Morris, N. He, K. G. Ray, P. Klonowski, H. Furukawa, I. N. Daniels, Y. A. Houndonougbo, M. Asta, O. M. Yaghi and B. B. Laird, *J. Phys. Chem. C*, 2012, **116**, 24084-24090.
3. M. He, J. Yao, L. Li, K. Wang, F. Chen and H. Wang, *ChemPlusChem*, 2013, **78**, 1222-1225.
4. J. A. Thompson, C. R. Blad, N. A. Brunelli, M. E. Lydon, R. P. Lively, C. W. Jones and S. Nair, *Chem. Mater.*, 2012, **24**, 1930-1936.
5. M. He, J. Yao, Q. Liu, Z. Zhong and H. Wang, *Dalton Trans.*, 2013, **42**, 16608-16613.
